# Supplementary material for: Accuracy of the Helicobacter pylori diagnostic tests in patients with peptic ulcer bleeding: a systematic review and network meta-analysis
Source: PubMed Central journal article supplement — Ther Adv Gastroenterol. 2020 Dec 16;13:1756284820965324. doi: 10.1177/1756284820965324 (PMC7747116; doi:10.1177/1756284820965324), 2020-12-16
Supplement: sj-pdf-1-tag-10.1177_1756284820965324.pdf [file sj-pdf-1-tag-10.1177_1756284820965324.pdf]

**Title:**

Accuracy of the *Helicobacter pylori* diagnostic tests in patients with peptic ulcer bleeding: A systematic review and network meta-analysis

**Author list:**

Nóra Vörhendi, Alexandra Soós, Marie Anne Engh, Benedek Tinusz, Zsolt Szakács, Dániel Pécsi, Alexandra Mikó, Patrícia Sarlós, Péter Hegyi, Bálint Erőss

## **SUPPLEMENTARY MATERIAL**

### **Table of content:**

**Supplementary Table 1:** PRISMA checklist for diagnostic test accuracy studies

**Supplementary Table 2:** Test performance against histology

**Supplementary Figure 2:** Test performance against histology

**Supplementary Table 3:** Test performance against rapid urease test

**Supplementary Figure 3:** Test performance against rapid urease test

**Supplementary Table 4:** Test performance against urea breath test

**Supplementary Figure 4:** Test performance against urea breath test

**Supplementary Table 5:** Test performance against serology

**Supplementary Figure 5:** Test performance against serology

**Supplementary Table 6:** Test performance against stool antigen test

**Supplementary Figure 6:** Test performance against stool antigen test

**Supplementary Table 7:** Test performance against culture

**Supplementary Figure 7:** Test performance against culture

**Supplementary Table 8:** Test performance against polymerase chain reaction

**Supplementary Figure 8:** Test performance against polymerase chain reaction

**Supplementary Table 1: PRISMA checklist for diagnostic test accuracy studies [1]**

| Section/topic                   | #  | PRISMA-Diagnostic test accuracy studies-Checklist Item                                                                                                                                                                                                                                                                                                                                                                                   | Reported on page # |
|---------------------------------|----|------------------------------------------------------------------------------------------------------------------------------------------------------------------------------------------------------------------------------------------------------------------------------------------------------------------------------------------------------------------------------------------------------------------------------------------|--------------------|
| <b>TITLE / ABSTRACT</b>         |    |                                                                                                                                                                                                                                                                                                                                                                                                                                          |                    |
| Title                           | 1  | Identify the report as a systematic review (+/- meta-analysis) of diagnostic test accuracy (DTA) studies.                                                                                                                                                                                                                                                                                                                                | 1                  |
| Abstract                        | 2  | Abstract                                                                                                                                                                                                                                                                                                                                                                                                                                 | 2                  |
| <b>INTRODUCTION</b>             |    |                                                                                                                                                                                                                                                                                                                                                                                                                                          |                    |
| Rationale                       | 3  | Describe the rationale for the review in the context of what is already known.                                                                                                                                                                                                                                                                                                                                                           | 3                  |
| Clinical role of index test     | D1 | State the scientific and clinical background, including the intended use and clinical role of the index test, and if applicable, the rationale for minimally acceptable test accuracy (or minimum difference in accuracy for comparative design).                                                                                                                                                                                        | 3                  |
| Objectives                      | 4  | Provide an explicit statement of question(s) being addressed in terms of participants, index test(s), and target condition(s).                                                                                                                                                                                                                                                                                                           | 3                  |
| <b>METHODS</b>                  |    |                                                                                                                                                                                                                                                                                                                                                                                                                                          |                    |
| Protocol and registration       | 5  | Indicate if a review protocol exists, if and where it can be accessed (e.g., Web address), and, if available, provide registration information including registration number.                                                                                                                                                                                                                                                            | 4                  |
| Eligibility criteria            | 6  | Specify study characteristics (participants, setting, index test(s), reference standard(s), target condition(s), and study design) and report characteristics (e.g., years considered, language, publication status) used as criteria for eligibility, giving rationale.                                                                                                                                                                 | 4                  |
| Information sources             | 7  | Describe all information sources (e.g., databases with dates of coverage, contact with study authors to identify additional studies) in the search and date last searched.                                                                                                                                                                                                                                                               | 4                  |
| Search                          | 8  | Present full search strategies for all electronic databases and other sources searched, including any limits used, such that they could be repeated.                                                                                                                                                                                                                                                                                     | 4                  |
| Study selection                 | 9  | State the process for selecting studies (i.e., screening, eligibility, included in systematic review, and, if applicable, included in the meta-analysis).                                                                                                                                                                                                                                                                                | 4                  |
| Data collection process         | 10 | Describe method of data extraction from reports (e.g., piloted forms, independently, in duplicate) and any processes for obtaining and confirming data from investigators.                                                                                                                                                                                                                                                               | 4, 5               |
| Definitions for data extraction | 11 | Provide definitions used in data extraction and classifications of target condition(s), index test(s), reference standard(s) and other characteristics (e.g. study design, clinical setting).                                                                                                                                                                                                                                            | 5                  |
| Risk of bias and applicability  | 12 | Describe methods used for assessing risk of bias in individual studies and concerns regarding the applicability to the review question.                                                                                                                                                                                                                                                                                                  | 5                  |
| Diagnostic accuracy measures    | 13 | State the principal diagnostic accuracy measure(s) reported (e.g. sensitivity, specificity) and state the unit of assessment (e.g. per-patient, per-lesion).                                                                                                                                                                                                                                                                             | 5, 6               |
| Synthesis of results            | 14 | Describe methods of handling data, combining results of studies, and describing variability between studies. This could include but is not limited to: a) handling of multiple definitions of target condition. b) handling of multiple thresholds of test positivity, c) handling multiple index test readers, d) handling of indeterminate test results, e) grouping and comparing tests, f) handling of different reference standards | 5, 6               |

| <b>Section/topic</b>           | <b>#</b> | <b>PRISMA-Diagnostic test accuracy studies-Checklist Item</b>                                                                                                                                                                                                                                     | <b>Reported on page #</b> |
|--------------------------------|----------|---------------------------------------------------------------------------------------------------------------------------------------------------------------------------------------------------------------------------------------------------------------------------------------------------|---------------------------|
| Meta-analysis                  | D2       | Report the statistical methods used for meta-analyses, if performed.                                                                                                                                                                                                                              | 4                         |
| Additional analyses            | 16       | Describe methods of additional analyses (e.g., sensitivity or subgroup analyses, meta-regression), if done, indicating which were pre-specified.                                                                                                                                                  | 5, 6                      |
| <b>RESULTS</b>                 |          |                                                                                                                                                                                                                                                                                                   |                           |
| Study selection                | 17       | Provide numbers of studies screened, assessed for eligibility, included in the review (and included in meta-analysis, if applicable) with reasons for exclusions at each stage, ideally with a flow diagram.                                                                                      | 6                         |
| Study characteristics          | 18       | For each included study provide citations and present key characteristics including: a) participant characteristics (presentation, prior testing), b) clinical setting, c) study design, d) target condition definition, e) index test, f) reference standard, g) sample size, h) funding sources | 6                         |
| Risk of bias and applicability | 19       | Present evaluation of risk of bias and concerns regarding applicability for each study.                                                                                                                                                                                                           | 9                         |
| Results of individual studies  | 20       | For each analysis in each study (e.g. unique combination of index test, reference standard, and positivity threshold) report 2x2 data (TP, FP, FN, TN) with estimates of diagnostic accuracy and confidence intervals, ideally with a forest or receiver operator characteristic (ROC) plot.      | 6, 8, 9                   |
| Synthesis of results           | 21       | Describe test accuracy, including variability; if meta-analysis was done, include results and confidence intervals.                                                                                                                                                                               | 6, 8, 9                   |
| Additional analysis            | 23       | Give results of additional analyses, if done (e.g., sensitivity or subgroup analyses, meta-regression; analysis of index test: failure rates, proportion of inconclusive results, adverse events).                                                                                                | 6, 8, 9                   |
| <b>DISCUSSION</b>              |          |                                                                                                                                                                                                                                                                                                   |                           |
| Summary of evidence            | 24       | Summarize the main findings including the strength of evidence.                                                                                                                                                                                                                                   | 11                        |
| Limitations                    | 25       | Discuss limitations from included studies (e.g. risk of bias and concerns regarding applicability) and from the review process (e.g. incomplete retrieval of identified research).                                                                                                                | 13                        |
| Conclusions                    | 26       | Provide a general interpretation of the results in the context of other evidence. Discuss implications for future research and clinical practice (e.g. the intended use and clinical role of the index test).                                                                                     | 13                        |
| <b>FUNDING</b>                 |          |                                                                                                                                                                                                                                                                                                   |                           |
| Funding                        | 27       | For the systematic review, describe the sources of funding and other support and the role of the funders.                                                                                                                                                                                         | 14                        |

**Supplementary Table 2:** Test performance against histology

| Network figure number | Criteria of the positive index tests                                                                           | Number of connections | Superiority Index (95 % CI†) | Sensitivity (95 % CI) | Specificity (95 % CI) |
|-----------------------|----------------------------------------------------------------------------------------------------------------|-----------------------|------------------------------|-----------------------|-----------------------|
| 7                     | Positive culture or two of the followings: histology, rapid urease test, serology, urea breath test            | 1                     | 7.51 (0.05-25)               | 0.79 (0.33-1.00)      | 0.70 (0.22-0.96)      |
| 8                     | Positive culture or two of the followings: rapid urease test, histology, serology                              | 1                     | 6.52 (0.05-23)               | 0.81 (0.29-1.00)      | 0.67 (0.17-0.96)      |
| 14                    | Positive urea breath test                                                                                      | 1                     | 5.98 (0.05-21)               | 0.73 (0.23-0.97)      | 0.77 (0.27-0.99)§     |
| 1                     | Positive at least two of the followings: rapid urease test, histology, urea breath test                        | 1                     | 4.48 (0.05-21)               | 0.72 (0.22-0.97)      | 0.72 (0.22-0.99)§     |
| 10                    | Positive histology or two of the followings: rapid urease test, serology, urea breath test                     | 1                     | 4.19 (0.05-21)               | 0.78 (0.29-1.00)      | 0.55 (0.14-0.91)      |
| 9                     | Positive histology or positive serology and urea breath test                                                   | 1                     | 4.17 (0.04-21)               | 0.81 (0.32-1.00)      | 0.51 (0.15-0.88)      |
| 11                    | Positive rapid urease test                                                                                     | 4                     | 3.84 (0.14-15)               | 0.75 (0.53-0.88)      | 0.78 (0.58-0.89)§     |
| 6                     | Positive culture or at least three of the followings: rapid urease test, histology, urea breath test, serology | 1                     | 3.65 (0.04-19)               | 0.79 (0.31-1.00)      | 0.50 (0.15-0.87)      |
| 3                     | Positive culture or positive rapid urease test and histology                                                   | 3                     | 3.12 (0.08-17)               | 0.81 (0.45-0.99)      | 0.61 (0.42-0.79)      |
| 5                     | Positive polymerase chain reaction                                                                             | 2                     | 3.09 (0.05-17)               | 0.83 (0.33-1.00)      | 0.45 (0.19-0.73)      |
| 2                     | Positive at least two of the followings: rapid urease test, histology, urea breath test, serology              | 2                     | 2.63 (0.04-15)               | 0.88 (0.43-1.00)‡     | 0.36 (0.06-0.71)      |
| 12                    | Positive rapid urease test or histology or urea breath test                                                    | 2                     | 2.54 (0.04-15)               | 0.88 (0.44-1.00)‡     | 0.36 (0.15-0.66)      |
| 4                     | Positive histology and culture or two of the followings: rapid urease test, urea breath test, serology         | 1                     | 1.55 (0.04-13)               | 0.86 (0.36-1.00)‡     | 0.23 (0-0.67)         |
| 13                    | Positive serology                                                                                              | 2                     | 1.29 (0.05-11)               | 0.70 (0.34-0.92)      | 0.58 (0.23-0.88)      |

†95% CI: 95% confidence interval, ‡: top three index test with the highest sensitivity, §: top three index test with the highest specificity

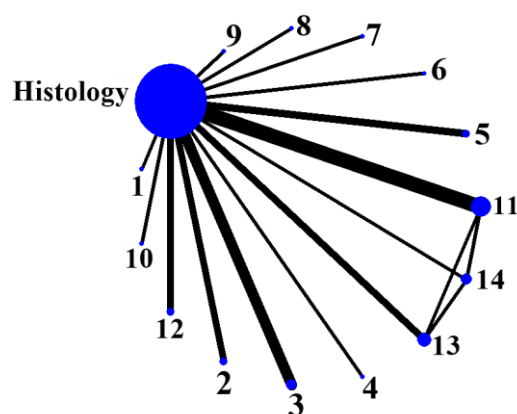

**Supplementary Figure 2:** Test performance against histology

**Supplementary Table 3: Test performance against rapid urease test**

| Network figure number | Criteria of the positive index tests                                                                   | Number of connections | Superiority Index (95 % CI)† | Sensitivity (95 % CI) | Specificity (95 % CI) |
|-----------------------|--------------------------------------------------------------------------------------------------------|-----------------------|------------------------------|-----------------------|-----------------------|
| 5                     | Positive histology and/or rapid urease test                                                            | 1                     | 9.94 (0.05-33)               | 0.84 (0.32-1.00)      | 0.59 (0.14-0.95)      |
| 12                    | Positive histology and urea breath test                                                                | 1                     | 7.89 (0.04-31)               | 0.81 (0.33-1.00)      | 0.61 (0.14-0.95)      |
| 2                     | Positive at least two of two followings: rapid urease test, histology, urea breath test                | 1                     | 7.24 (0.04-33)               | 0.86 (0.36-1.00)‡     | 0.46 (0.10-0.76)      |
| 13                    | Positive histology or culture                                                                          | 2                     | 6.69 (0.14-27)               | 0.83 (0.42-0.99)      | 0.67 (0.34-0.92)§     |
| 9                     | Positive culture or two of the followings: histology, rapid urease test, serology, urea breath test    | 1                     | 5.95 (0.05-27)               | 0.81 (0.29-1.00)      | 0.62 (0.15-0.94)§     |
| 11                    | Positive culture or two of the followings: rapid urease test, histology, serology                      | 1                     | 5.65 (0.03-25)               | 0.80 (0.33-1.00)      | 0.57 (0.04-0.94)      |
| 1                     | Positive at least two of the followings: rapid urease test, histology, urea breath test, serology      | 2                     | 5.65 (0.05-27)               | 0.91 (0.49-1.00)‡     | 0.43 (0.10-0.76)      |
| 8                     | Positive culture or three of the followings: rapid urease test, histology, urea breath test, serology  | 1                     | 4.32 (0.04-25)               | 0.83 (0.36-1.00)      | 0.52 (0.11-0.90)      |
| 16                    | Positive rapid urease test or positive histology or positive urea breath test                          | 2                     | 4.31 (0.04-23.05)            | 0.91 (0.46-1.00)‡     | 0.30 (0.03-0.70)      |
| 7                     | Positive polymerase chain reaction                                                                     | 1                     | 4.12 (0.04-29)               | 0.78 (0.33-1.00)      | 0.47 (0.07-0.90)      |
| 15                    | Positive histology or two of the followings: rapid urease test, serology, urea breath test             | 1                     | 3.72 (0.04-25)               | 0.85 (0.34-1.00)      | 0.39 (0.06-0.85)      |
| 14                    | Positive histology or positive serology and urea breath test                                           | 1                     | 3.50 (0.03-25)               | 0.83 (0.35-1.00)      | 0.36 (0.06-0.84)      |
| 4                     | Positive histology                                                                                     | 4                     | 3.16 (0.11-17)               | 0.82 (0.58-0.94)      | 0.63 (0.35-0.85)§     |
| 18                    | Positive urea breath test                                                                              | 1                     | 2.26 (0.04-19)               | 0.71 (0.22-0.98)      | 0.55 (0.15-0.90)      |
| 10                    | Positive culture or positive rapid urease test and histology                                           | 3                     | 2.11 (0.7-13.05)             | 0.73 (0.38-0.92)      | 0.62 (0.33-0.85)      |
| 17                    | Positive serology                                                                                      | 1                     | 1.59 (0.03-17.05)            | 0.71 (0.30-0.99)      | 0.45 (0.11-0.88)      |
| 6                     | Assumed 100% infection                                                                                 | 1                     | 1.24 (0.03-13)               | 0.85 (0.35-1.00)      | 0.15 (0-0.63)         |
| 3                     | Positive histology and culture or two of the followings: rapid urease test, urea breath test, serology | 1                     | 1.20 (0.03-17)               | 0.76 (0.30-1.00)      | 0.21 (00-0.69)        |

†95% CI: 95% confidence interval, ‡: top three index test with the highest sensitivity, §: top three index test with the highest specificity

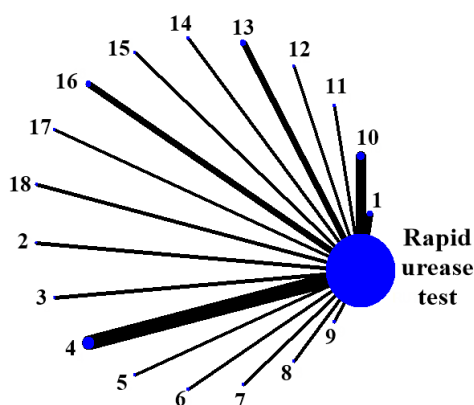

**Supplementary Figure 3: Test performance against rapid urease test**

**Supplementary Table 4: Test performance against urea breath test**

| Network figure number | Criteria of the positive index tests                                                                  | Number of connections | Superiority Index (95 % CI†) | Sensitivity (95 % CI) | Specificity (95 % CI) |
|-----------------------|-------------------------------------------------------------------------------------------------------|-----------------------|------------------------------|-----------------------|-----------------------|
| 9                     | Positive histology and rapid urease test                                                              | 1                     | 7.56 (0.07-23)               | 0.81 (0.34-1.00)‡     | 0.73 (0.23-0.99)§     |
| 2                     | Positive at least two of the followings: rapid urease test, histology, urea breath test, serology     | 2                     | 6.53 (0.08-21)               | 0.89 (0.48-1.00)‡     | 0.61 (0.16-0.97)      |
| 1                     | Positive at least two of the followings: rapid urease test, histology, urea breath test               | 1                     | 6.48 (0.07-21)               | 0.76 (0.24-0.99)      | 0.79 (0.31-1.00)§     |
| 7                     | Positive culture or two of the followings: histology, rapid urease test, serology, urea breath test   | 1                     | 4.53 (0.06-19)               | 0.77 (0.27-1.00)      | 0.61 (0.18-0.97)      |
| 8                     | Positive histology                                                                                    | 1                     | 3.97 (0.06-17.05)            | 0.74 (0.24-0.99)      | 0.69 (0.20-0.97)      |
| 5                     | Positive culture or three of the followings: rapid urease test, histology, urea breath test, serology | 1                     | 3.70 (0.06-17)               | 0.74 (0.24-0.99)      | 0.68 (0.21-0.98)      |
| 11                    | Positive histology or two of the followings: rapid urease test, serology, urea breath test            | 1                     | 3.08 (0.05-17)               | 0.80 (0.30-1.00)‡     | 0.55 (0.12-0.93)      |
| 6                     | Positive culture or positive rapid urease test and histology                                          | 1                     | 2.28 (0.05-15)               | 0.66 (0.18-0.98)      | 0.65 (0.18-0.97)      |
| 10                    | Positive histology or positive serology and urea breath test                                          | 1                     | 2.23 (0.05-15)               | 0.78 (0.26-1.00)      | 0.52 (0.10-0.91)      |
| 12                    | Positive rapid urease test                                                                            | 1                     | 1.97 (0.5-13)                | 0.60 (0.15-0.95)      | 0.70 (0.20-0.98)§     |
| 3                     | Positive histology and culture or two of the following: rapid urease test, urea breath test, serology | 1                     | 1.46 (0.04-11)               | 0.78 (0.32-1.00)      | 0.27 (0-0.73)         |
| 4                     | Positive polymerase chain reaction                                                                    | 1                     | 0.80 (0.04-7.05)             | 0.71 (0.22-0.99)      | 0.32 (0-0.82)         |

†95% CI: 95% confidence interval, ‡: top three index test with the highest sensitivity, §: top three index test with the highest specificity

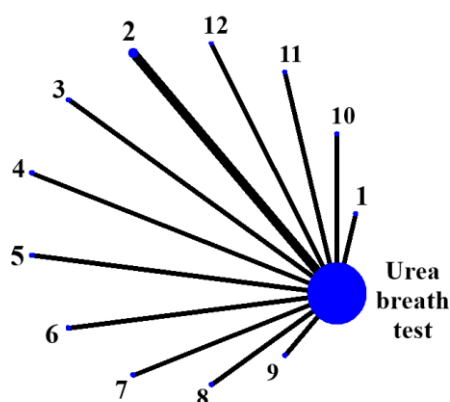

**Supplementary Figure 4: Test performance against urea breath test**

**Supplementary Table 5:** Test performance against serology

| Network figure number | Criteria of the positive index tests                                                                                    | Number of connections | Superiority Index (95 % CI) <sup>†</sup> | Sensitivity (95 % CI)         | Specificity (95 % CI)         |
|-----------------------|-------------------------------------------------------------------------------------------------------------------------|-----------------------|------------------------------------------|-------------------------------|-------------------------------|
| 2                     | Positive at least two of the followings: rapid urease test, histology, urea breath test, serology                       | 2                     | 7.81 (0.08-21)                           | 0.72 (0.35-0.97)              | 0.80 (0.23-1.00) <sup>§</sup> |
| 10                    | Positive histology or positive serology and urea breath test                                                            | 1                     | 5.69 (0.06-19)                           | 0.83 (0.36-0.99) <sup>‡</sup> | 0.57 (0.12-0.90)              |
| 11                    | Positive histology or two of the followings: rapid urease test, serology, urea breath test                              | 1                     | 5.06 (0.06-17)                           | 0.82 (0.29-0.99) <sup>‡</sup> | 0.52 (0.10-0.88)              |
| 6                     | Positive culture or positive at least three of the followings: rapid urease test, histology, urea breath test, serology | 1                     | 4.13 (0.06-19)                           | 0.70 (0.23-0.95)              | 0.66 (0.23-0.98)              |
| 1                     | Positive at least one of rapid urease test, histology, culture, urea breath test                                        | 1                     | 3.69 (0.05-15)                           | 0.80 (0.31-0.98)              | 0.47 (0.10-0.83)              |
| 9                     | Positive histology or positive culture                                                                                  | 1                     | 3.49 (0.06-17)                           | 0.72 (0.20-0.97)              | 0.58 (0.17-0.93)              |
| 3                     | Positive culture                                                                                                        | 1                     | 2.56 (0.05-15)                           | 0.51 (0.10-0.85)              | 0.71 (0.31-1.00) <sup>§</sup> |
| 12                    | Positive rapid urease test                                                                                              | 1                     | 2.37 (0.05-15)                           | 0.45 (0.12-0.88)              | 0.71 (0.30-0.98) <sup>§</sup> |
| 4                     | Positive histology                                                                                                      | 2                     | 2.19 (0.07-13)                           | 0.51 (0.23-0.87)              | 0.73 (0.36-0.94) <sup>§</sup> |
| 5                     | Positive histology and culture or any two of the followings: rapid urease test, urea breath test, serology              | 1                     | 1.97 (0.05-13)                           | 0.83 (0.31-1.00) <sup>‡</sup> | 0.20 (0-0.78)                 |
| 8                     | Positive culture or two of the followings: histology, rapid urease test, serology, urea breath test                     | 1                     | 1.90 (0.05-15)                           | 0.63 (0.18-0.92)              | 0.54 (0.16-0.93)              |
| 7                     | Positive culture or positive rapid urease test and histology                                                            | 3                     | 1.54 (0.08-11)                           | 0.65 (0.43-0.85)              | 0.57 (0.31-0.81)              |

<sup>†</sup>95% CI: 95% confidence interval, <sup>‡</sup>: top three index test with the highest sensitivity, <sup>§</sup>: top three index test with the highest specificity

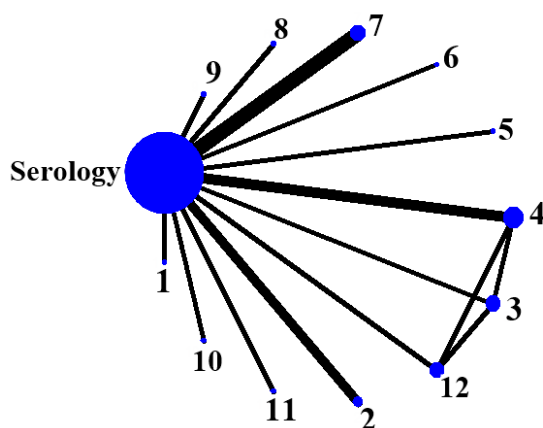

**Supplementary Figure 5:** Test performance against serology



**Supplementary Table 6:** Test performance against stool antigen test

| Network figure number | Criteria of the positive index tests                                                                | Number of connections | Superiority Index (95 % CI)† | Sensitivity (95 % CI) | Specificity (95 % CI) |
|-----------------------|-----------------------------------------------------------------------------------------------------|-----------------------|------------------------------|-----------------------|-----------------------|
| 3                     | Positive culture or positive rapid urease test and histology                                        | 4                     | 3.87 (0.33-9)                | 0.76 (0.56-0.89)‡     | 0.73 (0.49-0.89)§     |
| 4                     | Positive culture or two of the followings: histology, rapid urease test, serology, urea breath test | 1                     | 3.77 (0.11-11)               | 0.80 (0.32-1.00)‡     | 0.55 (0.13-0.93)      |
| 5                     | Positive histology or two of the followings: rapid urease test, serology, urea breath test          | 1                     | 2.66 (0.11-9.05)             | 0.72 (0.23-0.98)      | 0.56 (0.12-0.96)§     |
| 1                     | Positive at least two of the followings: rapid urease test, histology, urea breath test, serology   | 1                     | 2.24 (0.11-9)                | 0.65 (0.16-0.96)      | 0.61 (0.15-0.98)§     |
| 6                     | Positive rapid urease test or positive histology or positive urea breath test                       | 1                     | 1.27 (0.09-7)                | 0.79 (0.24-1.00)‡     | 0.21 (0-0.70)         |
| 2                     | Positive polymerase chain reaction                                                                  | 1                     | 0.92 (0.09-5.05)             | 0.65 (0.22-0.96)      | 0.38 (0.05-0.83)      |

†95% CI: 95% confidence interval, ‡: top three index test with the highest sensitivity, §: top three index test with the highest specificity

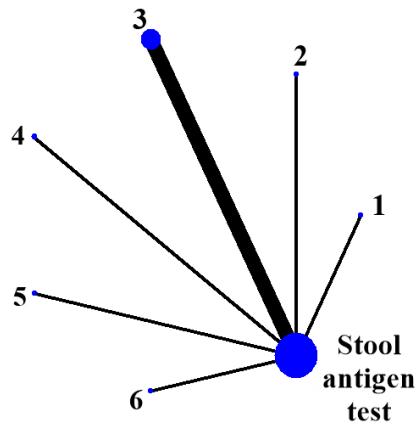

**Supplementary Figure 6:** Test performance against stool antigen test

**Supplementary Table 7:** Test performance against culture

| Network figure number | Criteria of the positive index tests                                                                       | Number of connections | Superiority Index (95 % CI†) | Sensitivity (95 % CI) | Specificity (95 % CI) |
|-----------------------|------------------------------------------------------------------------------------------------------------|-----------------------|------------------------------|-----------------------|-----------------------|
| 4                     | Positive culture or positive rapid urease test and histology                                               | 3                     | 7.35 (0.71-11)               | 0.94 (0.83-1.00)‡     | 0.77 (0.45-0.94)§     |
| 5                     | Positive culture or two of the followings: rapid urease test, histology, serology                          | 1                     | 2.28 (0.11-9)                | 0.84 (0.35-1.00)‡     | 0.46 (0.08-0.91)§     |
| 3                     | Positive culture or two of the followings: rapid urease test, histology, serology                          | 1                     | 2.17 (0.11-9)                | 0.82 (0.36-1.00)‡     | 0.49 (0.10-0.88)§     |
| 6                     | Positive serology                                                                                          | 1                     | 1.4 (0.11-7)                 | 0.80 (0.29-1.00)      | 0.44 (0.08-0.87)      |
| 2                     | Positive polymerase chain reaction                                                                         | 1                     | 1.19 (0.09-7)                | 0.76 (0.25-1.00)      | 0.42 (0.05-0.88)      |
| 1                     | Positive histology and culture or any two of the followings: rapid urease test, urea breath test, serology | 1                     | 0.97 (0.09-7)                | 0.82 (0.36-1.00)‡     | 0.22 (0-0.70)         |

†95% CI: 95% confidence interval, ‡: top three index test with the highest sensitivity, §: top three index test with the highest specificity

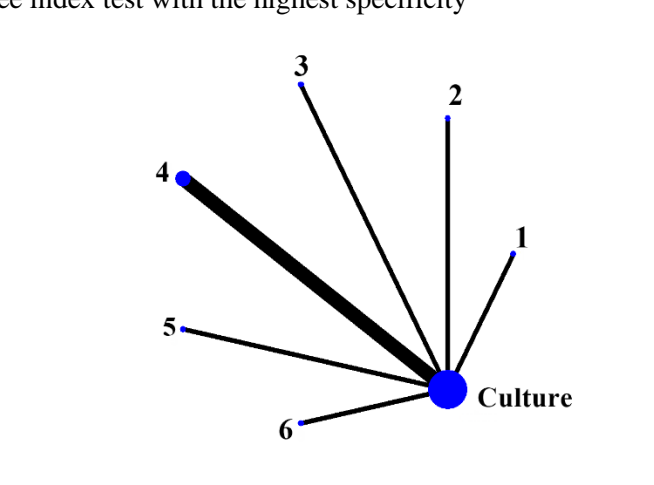

**Supplementary Figure 7:** Test performance against culture

**Supplementary Table 8:** Test performance against polymerase chain reaction

| Network figure number | Criteria of the positive index tests                                                                          | Number of connections | Superiority Index (95 % CI†) | Sensitivity (95 % CI) | Specificity (95 % CI) |
|-----------------------|---------------------------------------------------------------------------------------------------------------|-----------------------|------------------------------|-----------------------|-----------------------|
| 3                     | Positive culture or rapid urease test and histology                                                           | 2                     | 4.99 (0.11-13)               | 0.62 (0.34-0.88)‡     | 0.85 (0.48-0.96)§     |
| 1                     | Positive culture                                                                                              | 1                     | 4.47 (0.07-11)               | 0.42 (0.07-0.79)      | 0.83 (0.32-1.00)      |
| 4                     | Positive culture or positive 3 of the followings: rapid urease test, histology, urea breath test, serology    | 1                     | 4.44 (0.14-15)               | 0.68 (0.34-1.00)‡     | 0.80 (0.27-0.98)      |
| 8                     | Positive two of the followings: histology, rapid urease test, serology                                        | 1                     | 4.21 (0.11-15)               | 0.82 (0.30-0.99)‡     | 0.66 (0.31-0.99)      |
| 6                     | Positive rapid urease test                                                                                    | 1                     | 2.84 (0.09-13)               | 0.45 (0.14-0.88)      | 0.87 (0.34-1.00)§     |
| 5                     | Positive culture or two of the followings: histology, rapid urease test, stool antigen test, urea breath test | 1                     | 2.27 (0.09-13)               | 0.49 (0.19-0.93)      | 0.75 (0.31-0.99)      |
| 2                     | Positive histology                                                                                            | 2                     | 2.05 (0.09-11)               | 0.28 (0.09-0.69)      | 0.94 (0.54-1.00)§     |
| 9                     | Positive urea breath test                                                                                     | 1                     | 0.81 (0.08-5)                | 0.61 (0.30-0.99)      | 0.44 (0-0.83)         |
| 7                     | Positive stool antigen test                                                                                   | 1                     | 0.39 (0.07-3)                | 0.45 (0.13-0.87)      | 0.52 (0.12-0.87)      |

†95% CI: 95% confidence interval, ‡: top three index test with the highest sensitivity, §: top three index test with the highest specificity

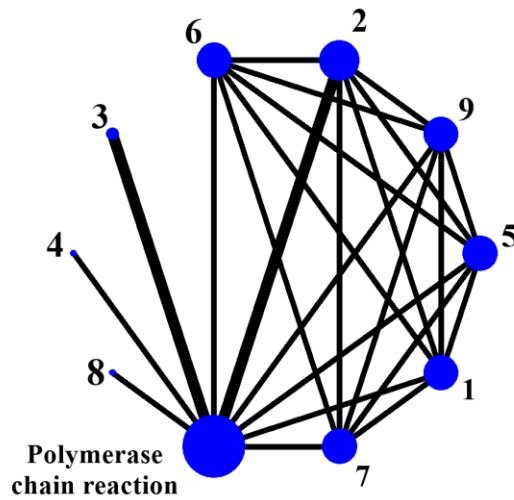

**Supplementary Figure 8:** Test performance against polymerase chain reaction

## Referenece

1. McInnes MDF, Moher D, Thombs BD, et al. Preferred Reporting Items for a Systematic Review and Meta-analysis of Diagnostic Test Accuracy Studies: The PRISMA-DTA Statement. *Jama* 2018;**319**(4):388-96
